# Supplementary material
Source: ML conference proceedings conference paper supplement (https://aclanthology.org/D19-1207)
Supplement: Attachment [file appendix.pdf › supplementary/appendix.pdf]

## A Supplemental Material

### A.1 Proposition 1 for Eqn. 13 in the paper

**Proposition 1:** Suppose that we have  $n$  matrices,  $I_1, I_2, \dots, I_n$ , and  $n$  vectors,  $w_1, w_2, \dots, w_n$ . The space of  $I_l$  is  $\mathbb{R}^{d \times t_l}$  and the space of  $w_l$  is  $\mathbb{R}^{1 \times t_l}$ . Then

$$\left( \bigotimes_{i=1}^n I_i \right) \circ \left( \bigotimes_{i=1}^n w_i \right) = \bigotimes_{i=1}^n I_i \circ w_i \quad (1)$$

**Proof:** We use  $C_l$  and  $C_r$  to denote the left side and right side of the equation, respectively. We utilize the element-wise comparison in two tensors. Following Eqn. 7 and 8 in the paper, the  $(r_1, \dots, r_n)$ -th entry of  $C_l$  is expressed as

$$(C_l)_{r_1, \dots, r_n} = \mathbf{1}_d \left[ \bigwedge_{i=1}^n (I_i)_{r_i} \right] \cdot \left[ \bigwedge_{i=1}^n (w_i)_{r_i} \right] \quad (2)$$

where  $(I_i)_{r_i}$  is a vector which denotes  $r_i$ -th column of the  $I_i$ ,  $(w_i)_{r_i}$  is the  $r_i$ -th value of the vector. Since  $(w_i)_{r_i}$  is a single element, we can directly multiply it with the corresponding vector  $(I_i)_{r_i}$ .

$$\begin{aligned} (C_l)_{r_1, \dots, r_n} &= \mathbf{1}_d \left[ \bigwedge_{i=1}^n (I_i \circ w_i)_{r_i} \right] \\ &= (C_r)_{r_1, \dots, r_n} \end{aligned} \quad (3)$$

The proposition is proven and is used to convert Eqn. 12 to Eqn. 13 in the paper.

### A.2 Proposition 2 for Eqn. 15 in the paper

**Proposition 2:** Suppose that we have  $n$  matrices,  $I_1, I_2, \dots, I_n$ . The space of  $I_l$  is  $\mathbb{R}^{d \times t_l}$ . Then

$$\sum_{i=1}^n \left( \bigotimes_{i=1}^n I_i \right) = \mathbf{1}_d \left[ \bigwedge_{i=1}^n (I_i) \mathbf{1}_{t_i} \right] \quad (4)$$

here we use vectors  $\mathbf{1}_d$  and  $\mathbf{1}_{t_i}$  which consist of 1 to represent the summation operation for matrix  $I_i$  in  $d$  dimension and  $t_i$  dimensions, respectively.

**Proof:** We use  $v_l$  to denote the left side of the equation and  $v_r$  to denote the right side of the equation. We can express  $v_l$  as

$$v_l = \sum_{r_1=1}^{t_1} \dots \sum_{r_n=1}^{t_n} C_{r_1, r_2, \dots, r_n} \quad (5)$$

$$C = \bigotimes_{i=1}^n I_i \quad (6)$$

Following Eqn. 7 and 8 in the paper, we can express  $C_{r_1, r_2, \dots, r_n}$  as

$$C_{r_1, r_2, \dots, r_n} = \mathbf{1}_d \left[ \bigwedge_{i=1}^n (I_i)_{r_i} \right] \quad (7)$$

We apply Eqn. 7 to Eqn. 5,

$$\begin{aligned} v_l &= \sum_{r_1=1}^{t_1} \dots \sum_{r_n=1}^{t_n} \mathbf{1}_d \left[ \bigwedge_{i=1}^n (I_i)_{r_i} \right] \\ &= \mathbf{1}_d \left[ \sum_{r_1=1}^{t_1} \dots \sum_{r_n=1}^{t_n} \bigwedge_{i=1}^n (I_i)_{r_i} \right] \\ &= \mathbf{1}_d \left[ \bigwedge_{i=1}^n (I_i) \mathbf{1}_{t_i} \right] = v_r \end{aligned} \quad (8)$$

The proposition is proven and is used to convert Eqn. 13 to Eqn. 15 in the paper.

### A.3 Learning Curves

We show the learning curves of the CIDEr on the validation set in Fig. 1 and observe that the L-HOCA-UBT performs better than HOCA-UBT and HOCA-U when the training converges.

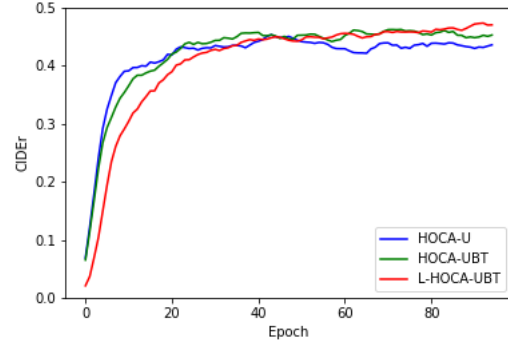

Figure 1: Learning curves of different methods on MSR-VTT, where the rank of L-HOCA-UBT is 1. Note that we use greedy search during training while beam search during testing, so the testing scores are higher.

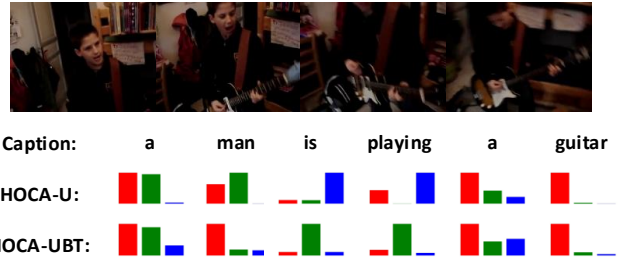

Figure 2: Visualization of the attention weights in multiple attentive fusion (MAF) module, the red bar denotes image modality, the green bar denotes motion modality, the blue bar denotes audio modality.

### A.4 Visualization of Attention Weights

We also perform visualization of the attention weights in multiple attentive fusion (MAF) module. As shown in Fig. 2, HOCA-UBT obtains a

more accurate ratio of each modality than HOCA-U, i.e. for the word “man”, HOCA-U obtains a higher score of motion modality, which violates human subjective understanding.
